# Supplementary material
Source: PubMed Central journal article supplement (PMC4129402)
Supplement: mmc1.pdf [file mmc1.pdf]

The American Journal of Human Genetics, Volume 95

Supplemental Data

## **Mutations in *LAMA1* Cause Cerebellar Dysplasia and Cysts with and without Retinal Dystrophy**

Kimberly A. Aldinger, Stephen J. Mosca, Martine Tétreault, Jennifer C. Dempsey, Gisele E. Ishak, Taila Hartley, Ian G. Phelps, Ryan E. Lamont, Diana R. O'Day, Donald Basel, Karen W. Gripp, Laura Baker, Mark J. Stephan, Francois P. Bernier, Kym M. Boycott, Jacek Majewski, University of Washington Center for Mendelian Genomics, Care4Rare Canada, Jillian S. Parboosingh, A. Micheil Innes, and Dan Doherty

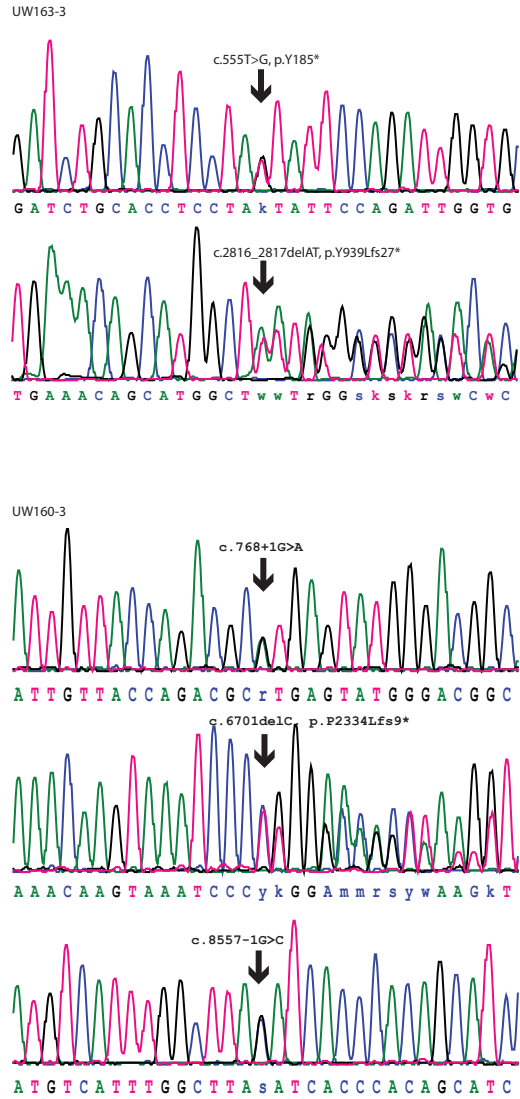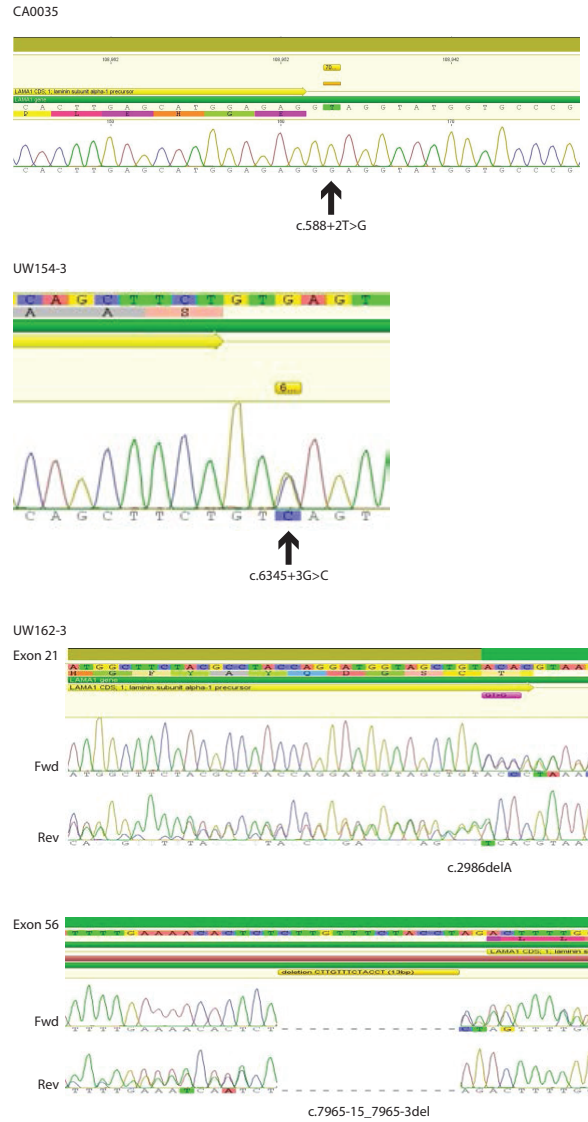

**Figure S1. Sanger validations.** Chromatograms showing Sanger sequencing confirmation for variants identified through exome sequencing in probands.

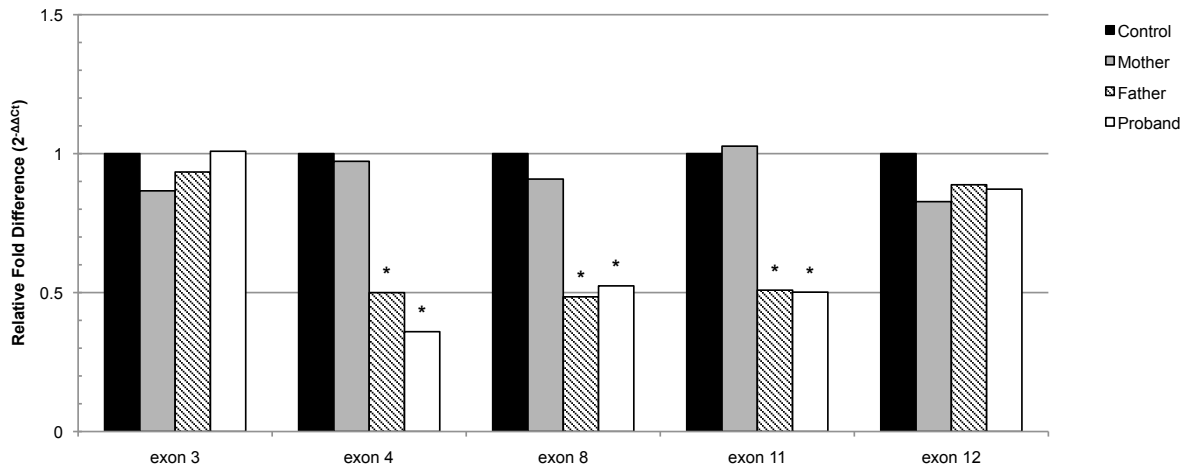

**Figure S2. qPCR confirmation of paternally inherited *LAMA1* exon 4-11 deletion in UW154-3.** Relative comparison of exon copy number within and flanking the deleted region. Fold-differences were calculated using the comparative-Ct method relative to a pooled sample of 1,000 unaffected males. Asterisk denotes copy number loss (0.5 fold differences relative to control).

**Table S1. QC metrics and coverage summary of exome data in affected individuals with *LAMA1* mutations**

|                         | CA0035      | UW154-3     | UW162-3     | UW160-3    | UW163-3     |
|-------------------------|-------------|-------------|-------------|------------|-------------|
| Total reads             | 127 385 980 | 113 569 944 | 118 968 257 | 93 983 564 | 122 559 090 |
| Total aligned reads     | 122 364 705 | 109 355 622 | 116 472 257 | 93 839 687 | 122 339 041 |
| Mean read length        | 96.72       | 94.5        | 94.661      | 49.1       | 49.45       |
| Mean coverage           | 130.96X     | 111.38X     | 126.83X     | 51.58X     | 66.1X       |
| Coverage in CCDS region |             |             |             |            |             |
| 5X                      | 97.60%      | 97.70%      | 97.70%      | 95.00%     | 95.30%      |
| 10X                     | 96.90%      | 97.00%      | 97.10%      | 91.40%     | 92%         |
| 20X                     | 95.10%      | 95.10%      | 95.30%      | 82.00%     | 83.90%      |
| 50X                     | 84.80%      | 82%         | 84.30%      | 46.30%     | 56.40%      |

**Table S2. Variant filtering summary of exome data in affected individuals with *LAMA1* mutations**

|                                                                                                | <b>CA0035</b> | <b>UW154-3</b> | <b>UW162-3</b> | <b>UW160-3</b> | <b>UW160-3</b> |
|------------------------------------------------------------------------------------------------|---------------|----------------|----------------|----------------|----------------|
| <b>Total variants</b>                                                                          | 220 838       | 201 040        | 216 288        | 121 246        | 151 142        |
| <b>Non-synonymous/splicing/coding indel variants</b>                                           | 13 401        | 11 991         | 11 758         | 11 218         | 12 908         |
| <b>After excluding variants reported in 1000 genomes and EVS datasets (frequency &gt;0.5%)</b> | 615           | 504            | 427            | 346            | 1 285          |
| <b>After excluding variants present in &gt;5 in-house exomes</b>                               | 395           | 279            | 225            | 306            | 1 132          |
| <b>Homozygous variants in CA0035</b>                                                           | 19            | ---            | ---            | ---            |                |
|                                                                                                |               |                |                |                |                |
| <b>Genes shared by all affected</b>                                                            | TTN, LAMA1    |                |                |                |                |
